# Supplementary material
Source: publisher figshare collection journal article supplement (https://sage.figshare.com/ndownloader/files/22213821)
Supplement: Supplementary file 1 [file 22213821]

## Appendix

| Table A1: “Optimal” Decisions                     |       |                 |                     |               |                        |                                                   |                     |       |                 |                     |               |                        |                    |
|---------------------------------------------------|-------|-----------------|---------------------|---------------|------------------------|---------------------------------------------------|---------------------|-------|-----------------|---------------------|---------------|------------------------|--------------------|
| Chance of Win = 60%                               | Round | Walk Away Money | Money In Next Round | Chance of Win | Expected Value of Play | Play or Walk Away?                                | Chance of Win = 70% | Round | Walk Away Money | Money In Next Round | Chance of Win | Expected Value of Play | Play or Walk Away? |
|                                                   | 1     | 0.25            | 1.25                | 60%           | 0.75                   | Play                                              |                     | 1     | 0.25            | 1.25                | 70%           | 0.875                  | Play               |
|                                                   | 2     | 1.25            | 2.25                | 60%           | 1.35                   | Play                                              |                     | 2     | 1.25            | 2.25                | 70%           | 1.575                  | Play               |
|                                                   | 3     | 2.25            | 3.25                | 60%           | 1.95                   | Walk Away                                         |                     | 3     | 2.25            | 3.25                | 70%           | 2.275                  | Play               |
|                                                   | 4     | 3.25            | 4.25                | 60%           | 2.55                   | Walk Away                                         |                     | 4     | 3.25            | 4.25                | 70%           | 2.975                  | Walk Away          |
|                                                   | 5     | 4.25            | 5.25                | 60%           | 3.15                   | Walk Away                                         |                     | 5     | 4.25            | 5.25                | 70%           | 3.675                  | Walk Away          |
|                                                   | 6     | 5.25            | 6.25                | 60%           | 3.75                   | Walk Away                                         |                     | 6     | 5.25            | 6.25                | 70%           | 4.375                  | Walk Away          |
|                                                   | 7     | 6.25            | 7.25                | 60%           | 4.35                   | Walk Away                                         |                     | 7     | 6.25            | 7.25                | 70%           | 5.075                  | Walk Away          |
|                                                   | 8     | 7.25            | 8.25                | 60%           | 4.95                   | Walk Away                                         |                     | 8     | 7.25            | 8.25                | 70%           | 5.775                  | Walk Away          |
|                                                   | 9     | 8.25            | 9.25                | 60%           | 5.55                   | Walk Away                                         |                     | 9     | 8.25            | 9.25                | 70%           | 6.475                  | Walk Away          |
|                                                   | 10    | 9.25            | 10.25               | 60%           | 6.15                   | Walk Away                                         |                     | 10    | 9.25            | 10.25               | 70%           | 7.175                  | Walk Away          |
| Number of rounds that maximize expected value = 2 |       |                 |                     |               |                        | Number of rounds that maximize expected value = 3 |                     |       |                 |                     |               |                        |                    |
| Chance of Win = 80%                               | Round | Walk Away Money | Money In Next Round | Chance of Win | Expected Value of Play | Play or Walk Away?                                | Chance of Win = 90% | Round | Walk Away Money | Money In Next Round | Chance of Win | Expected Value of Play | Play or Walk Away? |
|                                                   | 1     | 0.25            | 1.25                | 80%           | 1                      | Play                                              |                     | 1     | 0.25            | 1.25                | 90%           | 1.125                  | Play               |
|                                                   | 2     | 1.25            | 2.25                | 80%           | 1.8                    | Play                                              |                     | 2     | 1.25            | 2.25                | 90%           | 2.025                  | Play               |
|                                                   | 3     | 2.25            | 3.25                | 80%           | 2.6                    | Play                                              |                     | 3     | 2.25            | 3.25                | 90%           | 2.925                  | Play               |
|                                                   | 4     | 3.25            | 4.25                | 80%           | 3.4                    | Play                                              |                     | 4     | 3.25            | 4.25                | 90%           | 3.825                  | Play               |
|                                                   | 5     | 4.25            | 5.25                | 80%           | 4.2                    | Walk Away                                         |                     | 5     | 4.25            | 5.25                | 90%           | 4.725                  | Play               |
|                                                   | 6     | 5.25            | 6.25                | 80%           | 5                      | Walk Away                                         |                     | 6     | 5.25            | 6.25                | 90%           | 5.625                  | Play               |
|                                                   | 7     | 6.25            | 7.25                | 80%           | 5.8                    | Walk Away                                         |                     | 7     | 6.25            | 7.25                | 90%           | 6.525                  | Play               |
|                                                   | 8     | 7.25            | 8.25                | 80%           | 6.6                    | Walk Away                                         |                     | 8     | 7.25            | 8.25                | 90%           | 7.425                  | Play               |
|                                                   | 9     | 8.25            | 9.25                | 80%           | 7.4                    | Walk Away                                         |                     | 9     | 8.25            | 9.25                | 90%           | 8.325                  | Play               |
|                                                   | 10    | 9.25            | 10.25               | 80%           | 8.2                    | Walk Away                                         |                     | 10    | 9.25            | 10.25               | 90%           | 9.225                  | Walk Away          |
| Number of rounds that maximize expected value = 4 |       |                 |                     |               |                        | Number of rounds that maximize expected value = 9 |                     |       |                 |                     |               |                        |                    |

| Table A2: Expected Values for Each Round Played |       |                       |                     |                       |                     |                       |                     |                       |                     |
|-------------------------------------------------|-------|-----------------------|---------------------|-----------------------|---------------------|-----------------------|---------------------|-----------------------|---------------------|
| Rounds Played                                   | Bank  | 60%                   |                     | 70%                   |                     | 80%                   |                     | 90%                   |                     |
|                                                 |       | Chance of Being Alive | Expected Value      |
| 0                                               | 0.25  | 100.00%               | 0.250               | 100.00%               | 0.250               | 100.00%               | 0.250               | 100.00%               | 0.250               |
| 1                                               | 1.25  | 60.00%                | 0.750               | 70.00%                | 0.875               | 80.00%                | 1.000               | 90.00%                | 1.125               |
| 2                                               | 2.25  | 36.00%                | <b><u>0.810</u></b> | 49.00%                | 1.103               | 64.00%                | 1.440               | 81.00%                | 1.823               |
| 3                                               | 3.25  | 21.60%                | 0.702               | 34.30%                | <b><u>1.115</u></b> | 51.20%                | 1.664               | 72.90%                | 2.369               |
| 4                                               | 4.25  | 12.96%                | 0.551               | 24.01%                | 1.020               | 40.96%                | <b><u>1.741</u></b> | 65.61%                | 2.788               |
| 5                                               | 5.25  | 7.78%                 | 0.408               | 16.81%                | 0.882               | 32.77%                | 1.720               | 59.05%                | 3.100               |
| 6                                               | 6.25  | 4.67%                 | 0.292               | 11.76%                | 0.735               | 26.21%                | 1.638               | 53.14%                | 3.322               |
| 7                                               | 7.25  | 2.80%                 | 0.203               | 8.24%                 | 0.597               | 20.97%                | 1.520               | 47.83%                | 3.468               |
| 8                                               | 8.25  | 1.68%                 | 0.139               | 5.76%                 | 0.476               | 16.78%                | 1.384               | 43.05%                | 3.551               |
| 9                                               | 9.25  | 1.01%                 | 0.093               | 4.04%                 | 0.373               | 13.42%                | 1.242               | 38.74%                | <b><u>3.584</u></b> |
| 10                                              | 10.25 | 0.60%                 | 0.062               | 2.82%                 | 0.290               | 10.74%                | 1.101               | 34.87%                | 3.574               |

Table A3: Robustness Checks for Section 4.1

| H <sub>a</sub> : Rounds Played = Optimal Number of Rounds |                     |      |         |                                                |        |                           |                                                |
|-----------------------------------------------------------|---------------------|------|---------|------------------------------------------------|--------|---------------------------|------------------------------------------------|
| Probability of Win                                        | Commitment Scenario | Obs. | T-Test  |                                                |        | Wilcoxon Signed-Rank Test |                                                |
|                                                           |                     |      | p-value | Difference significant at 95% confidence level | Power  | p-value                   | Difference significant at 95% confidence level |
| 60%                                                       | None                | 91   | 0.0709  | No                                             | 1.0000 | 0.0097                    | Yes                                            |
|                                                           | Upfront             | 111  | 0.0100  | Yes                                            | 0.7380 | 0.0515                    | No                                             |
| 70%                                                       | None                | 95   | 0.0002  | Yes                                            | 0.9648 | 0.0001                    | Yes                                            |
|                                                           | Upfront             | 111  | 0.0256  | Yes                                            | 0.6117 | 0.1736                    | No                                             |
| 80%                                                       | None                | 100  | 0.1123  | No                                             | 0.3546 | 0.0235                    | Yes                                            |
|                                                           | Upfront             | 111  | 0.0217  | Yes                                            | 0.6366 | 0.1879                    | No                                             |
| 90%                                                       | None                | 109  | 0.0000  | Yes                                            | 1.0000 | 0.0000                    | Yes                                            |
|                                                           | Upfront             | 111  | 0.0000  | Yes                                            | 1.0000 | 0.0000                    | Yes                                            |

Notes: The variable of interest is the average number of rounds played, per individual, per treatment. The alternative hypothesis is that the average number of rounds played is equal to the optimal number of rounds. Table shows results of a two-sided t test and a Wilcoxon signed-rank test. To account for truncation, observations for the No Commitment game only include those who did not draw a losing ball for that session.

Table A4: Poisson Regression of Rounds Played<sup>a</sup>

|                        | Both Games                        | No Commitment                     | Upfront Commitment                |
|------------------------|-----------------------------------|-----------------------------------|-----------------------------------|
| Probability = 70       | 0.359<br>(0.056)***<br>[0.031]*** | 0.365<br>(0.077)***<br>[0.053]*** | 0.364<br>(0.082)***<br>[0.025]*** |
| Probability = 80       | 0.693<br>(0.052)***<br>[0.039]*** | 0.737<br>(0.071)***<br>[0.059]*** | 0.645<br>(0.077)***<br>[0.032]*** |
| Probability = 90       | 1.029<br>(0.049)***<br>[0.043]*** | 1.091<br>(0.066)***<br>[0.061]*** | 0.942<br>(0.074)***<br>[0.038]*** |
| Upfront Commitment     | 0.179<br>(0.030)***<br>[0.033]*** |                                   |                                   |
| Holt-Laury Risk Averse | - 0.078<br>(0.035)**<br>[0.060]   | - 0.051<br>(0.045)<br>[0.069]     | - 0.121<br>(0.058)**<br>[0.073]   |
| Smoker                 | 0.200<br>(0.048)***<br>[0.105]*   | 0.12<br>(0.062)**<br>[0.117]      | 0.312<br>(0.076)***<br>[0.125]**  |
| Male                   | - 0.115<br>(0.030)***<br>[0.063]* | - 0.118<br>(0.038)***<br>[0.070]* | - 0.109<br>(0.050)**<br>[0.070]   |
| Constant               | 0.696<br>(0.056)***<br>[0.067]*** | 0.642<br>(0.074)***<br>[0.084]*** | 0.937<br>(0.080)***<br>[0.075]*** |
| Observations           | 1,299                             | 855                               | 444                               |

<sup>a</sup>Notes: Regressions conducting using Poisson. The dependent variable is the number of rounds chosen to play for every session of the games. The omitted probability is 60%. To account for truncation, observations for the No Commitment game only include those who did not draw a losing ball for that session. For the Upfront Commitment game, all observations are included. Significance levels: \*\*\* p<0.01, \*\* p<0.05, \* p<0.1. Standard errors are in parentheses. Clustered (by individual) standard errors are in brackets.

Table A5: Ordinary Least Squares Regression of Rounds Played – Session 1 Only<sup>a</sup>

|                        | Both Games                        | No Commitment                     | Upfront Commitment                |
|------------------------|-----------------------------------|-----------------------------------|-----------------------------------|
| Probability = 70       | 1.019<br>(0.191)***<br>[0.075]*** | 1.010<br>(0.445)**<br>[0.243]***  | 1.009<br>(0.213)***<br>[0.069]*** |
| Probability = 80       | 2.123<br>(0.184)***<br>[0.110]*** | 2.175<br>(0.379)***<br>[0.278]*** | 2.081<br>(0.213)***<br>[0.106]*** |
| Probability = 90       | 3.579<br>(0.180)***<br>[0.154]*** | 3.571<br>(0.344)***<br>[0.286]*** | 3.595<br>(0.213)***<br>[0.153]*** |
| Upfront Commitment     | 0.540<br>(0.149)***<br>[0.154]*** |                                   |                                   |
| Holt-Laury Risk-Averse | - 0.377<br>(0.158)***<br>[0.272]  | - 0.101<br>(0.308)<br>[0.335]     | - 0.477<br>(0.185)**<br>[0.298]   |
| Smoker                 | 1.102<br>(0.230)***<br>[0.504]**  | 0.234<br>-0.524<br>[0.714]        | 1.316<br>(0.257)***<br>[0.584]**  |
| Male                   | - 0.454<br>(0.135)***<br>[0.258]* | - 0.527<br>(0.272)*<br>[0.356]    | - 0.427<br>(0.157)***<br>[0.272]  |
| Constant               | 2.129<br>(0.225)***<br>[0.267]*** | 2.003<br>(0.398)***<br>[0.357]*** | 2.721<br>(0.221)***<br>[0.280]*** |
| Observations           | 601                               | 157                               | 444                               |

<sup>a</sup>Notes: Regressions conducted using ordinary least squares. The dependent variable is the number of rounds chosen to play in session 1 of the games. The omitted probability is 60%. To account for truncation, observations for the No Commitment game only include those who did not draw a losing ball for that session. For the Upfront Commitment game, all observations are included. Significance levels: \*\*\* p<0.01, \*\* p<0.05, \* p<0.1. Standard errors are in parentheses. Clustered (by individual) standard errors are in brackets.

Table A6: Robustness Checks for Section 4.2

| H <sub>a</sub> : Upfront Commitment > No Commitment |      |         |                                                |        |                           |                                                |
|-----------------------------------------------------|------|---------|------------------------------------------------|--------|---------------------------|------------------------------------------------|
| Probability of Win                                  | Obs. | T-Test  |                                                |        | Wilcoxon Signed-Rank Test |                                                |
|                                                     |      | p-value | Difference significant at 95% confidence level | Power  | p-value                   | Difference significant at 95% confidence level |
| 60%                                                 | 91   | 0.0069  | Yes                                            | 0.8012 | 0.0205                    | Yes                                            |
| 70%                                                 | 95   | 0.0000  | Yes                                            | 0.9928 | 0.0002                    | Yes                                            |
| 80%                                                 | 100  | 0.0009  | Yes                                            | 0.9393 | 0.0049                    | Yes                                            |
| 90%                                                 | 109  | 0.0006  | Yes                                            | 0.9536 | 0.0284                    | Yes                                            |

Notes: The variable of interest is the average number of rounds played, per individual, per treatment. The alternative hypothesis is that the average number of rounds played under the Upfront Commitment scenario is less than or equal to the number of rounds played in under the No Commitment scenario. Table shows results of a one-sided t test and a Wilcoxon signed-rank test. To account for truncation, observations for the No Commitment game only include those who did not draw a losing ball for that session.

Table A7: Robustness Checks for Section 4.3

| T-Test ( $H_a$ : 60%<70%; 70%<80%; 80%<90%) |                     |      |         |                                                |        |                           |                                                |
|---------------------------------------------|---------------------|------|---------|------------------------------------------------|--------|---------------------------|------------------------------------------------|
| Probability of Win                          | Commitment Scenario | Obs. | T-Test  |                                                |        | Wilcoxon Signed-Rank Test |                                                |
|                                             |                     |      | p-value | Difference significant at 95% confidence level | Power  | p-value                   | Difference significant at 95% confidence level |
| 60% vs. 70%                                 | None                | 81   | 0.0000  | Yes                                            | 1.0000 | 0.0000                    | Yes                                            |
|                                             | Upfront             | 111  | 0.0000  | Yes                                            | 1.0000 | 0.0000                    | Yes                                            |
| 70% vs. 80%                                 | None                | 85   | 0.0000  | Yes                                            | 1.0000 | 0.0000                    | Yes                                            |
|                                             | Upfront             | 111  | 0.0000  | Yes                                            | 1.0000 | 0.0000                    | Yes                                            |
| 80% vs. 90%                                 | None                | 98   | 0.0000  | Yes                                            | 1.0000 | 0.0000                    | Yes                                            |
|                                             | Upfront             | 111  | 0.0000  | Yes                                            | 1.0000 | 0.0000                    | Yes                                            |

Notes: The variable of interest is the average number of rounds played, per individual, per treatment. The alternative hypothesis is that the average number of rounds played under the higher probability of success scenario is less than or equal to the number of rounds played in under the lower probability of success scenario. Table shows results of a one-sided t test and a Wilcoxon signed-rank test. To account for truncation, observations for the No Commitment game only include those who did not draw a losing ball for that session.

Table A8: Robustness Checks for Section 4.4

| Sample: 60%, 70%, and 80% Win Probability Scenarios |            |         |       |
|-----------------------------------------------------|------------|---------|-------|
| Length                                              | Commitment |         |       |
|                                                     | None       | Upfront | Total |
| Too Few                                             | 280        | 105     | 385   |
| Optimal                                             | 160        | 208     | 286   |
| Too Many                                            | 216        | 120     | 336   |
| Total                                               | 656        | 333     | 989   |

Chi-squared      p-value  
12.956            0.002

| Sample: No Commitment Game |             |     |     |       |
|----------------------------|-------------|-----|-----|-------|
| Length                     | Probability |     |     |       |
|                            | 60%         | 70% | 80% | Total |
| Too Few                    | 69          | 100 | 111 | 280   |
| Optimal                    | 60          | 53  | 47  | 160   |
| Too Many                   | 55          | 72  | 89  | 216   |
| Total                      | 184         | 225 | 247 | 656   |

Chi-squared      p-value  
10.985            0.027

| Sample: Upfront Commitment Game |             |     |     |       |
|---------------------------------|-------------|-----|-----|-------|
| Length                          | Probability |     |     |       |
|                                 | 60%         | 70% | 80% | Total |
| Too Few                         | 30          | 36  | 39  | 105   |
| Optimal                         | 40          | 37  | 31  | 108   |
| Too Many                        | 41          | 38  | 41  | 120   |
| Total                           | 111         | 111 | 111 | 333   |

Chi-squared      p-value  
2.517            0.642

| Sample: Both Games |             |     |     |       |
|--------------------|-------------|-----|-----|-------|
| Length             | Probability |     |     |       |
|                    | 60%         | 70% | 80% | Total |
| Too Few            | 99          | 136 | 150 | 385   |
| Optimal            | 100         | 90  | 78  | 268   |
| Too Many           | 96          | 110 | 130 | 336   |
| Total              | 295         | 336 | 358 | 989   |

Chi-squared      p-value  
12.88            0.012
